# Supplementary material for: Evaluating structure–property relationship in a new family of mechanically flexible co-crystals
Source: Royal Society of Chemistry journal article supplement (doi:10.1039/d2cc02047e), 2022-01-01
Supplement: d2cc02047e1.pdf [file d2cc02047e1.pdf]

## **Evaluating structure-property relationship in a new family of mechanically flexible co-crystals**

Amila M. Abeysekera<sup>a</sup>, Boris B. Averkiev<sup>a</sup>, Abhijeet S. Sinha<sup>a</sup> and Christer B. Aakeroy<sup>\*a</sup>

1. Primary intermolecular interaction in the co-crystals
  - 1.1 Primary hydrogen-bond interactions
  - 1.2 Primary hydrogen- and halogen bond interactions in the two plastic co-crystals
  - 1.3 Hydrogen- and halogen and bond geometries in these co-crystals
2. Secondary intermolecular interaction in the co-crystals
3. Establishing structure-property correlations using crystal packing features.
4. X-ray crystallography results
5. Synthesis of target molecules
6. Synthesis of co-crystals
7. Images of crystals demonstrating flexibility

# 1. Primary intermolecular interaction in the co-crystals

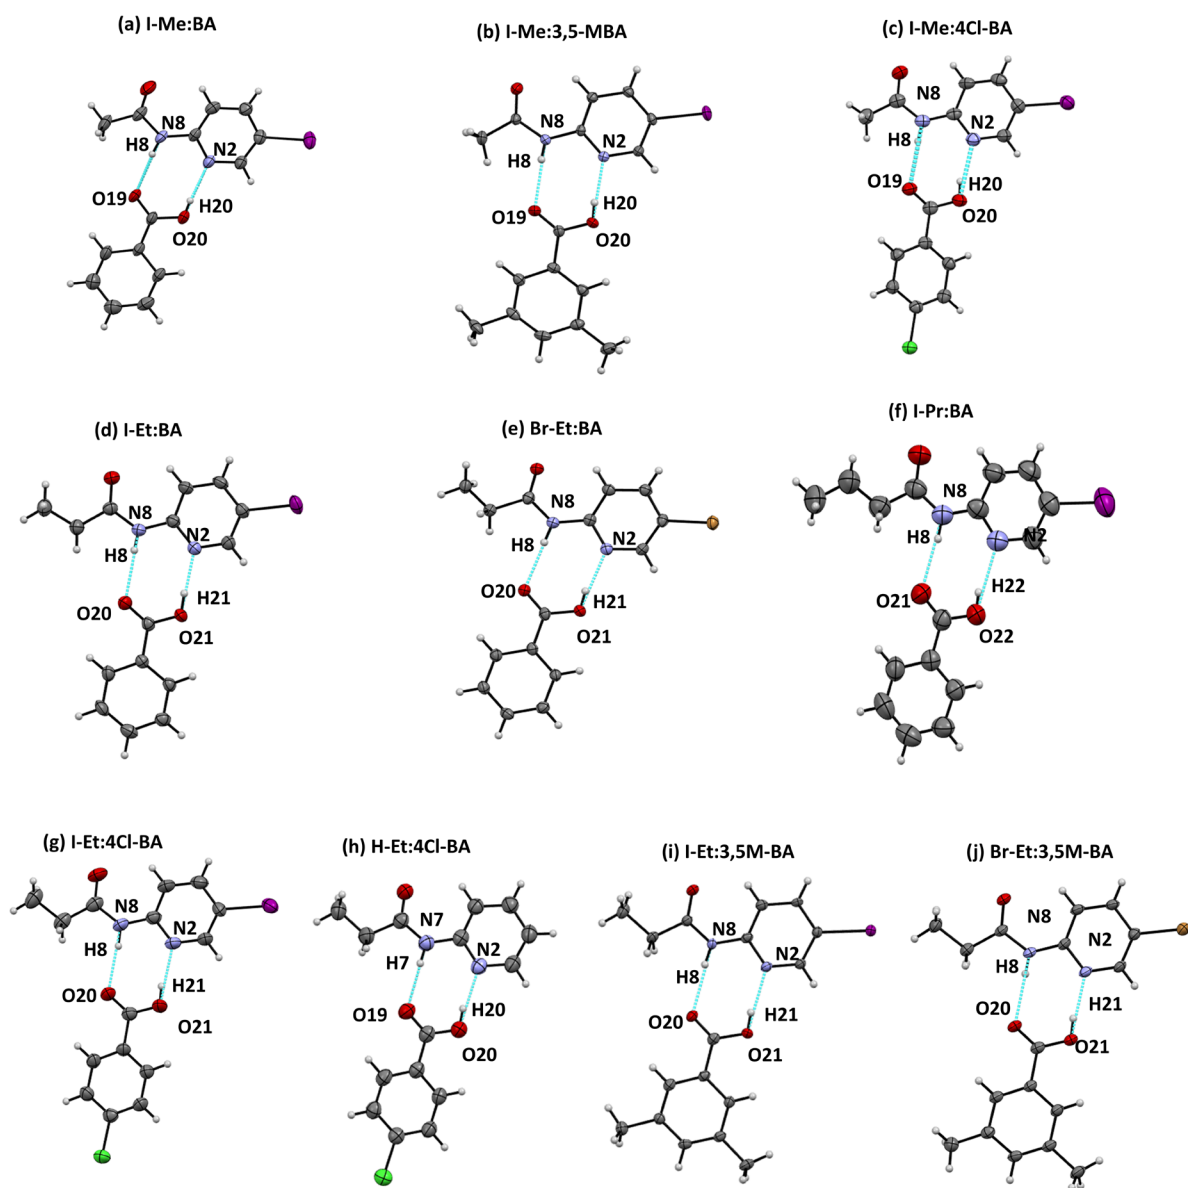

**Figure 1.** Primary hydrogen-bond interaction interactions in (a) I-Me:BA (b) I-Me:3,5M-BA (c) I-Me:4Cl-BA (d) I-Et:BA (e) Br-Et:BA (f) I-Pr:BA (g) I-Et:4Cl-BA (h) H-Et:4Cl-BA (i) I-Et:3,5-MBA (j) I-Et:3,5-MBA

## 1.2 Primary hydrogen- and halogen bond interactions in the two plastic co-crystals.

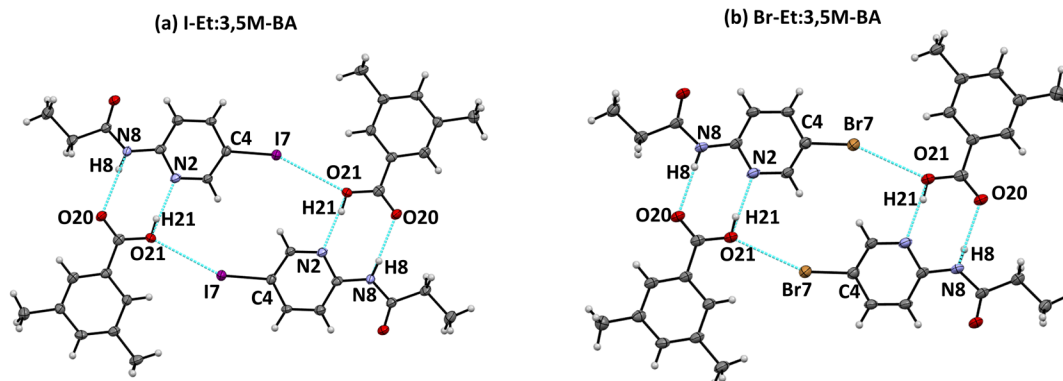

**Figure 2.** Primary hydrogen- and halogen bond interactions in (a) I-Et:3,5M-BA and (b) Br-Et:3,5M-BA

## 1.3. Hydrogen- and halogen and bond geometries in these co-crystals

**Table 1.** The relevant hydrogen- and halogen and bond geometries in these co-crystals

| Code          | D-H/I...A    | D/I...A (Å) | D-H...A (deg) |
|---------------|--------------|-------------|---------------|
| I-Me:BA       | N8-H8...O19  | 2.889(6)    | 173.(6)       |
|               | O20-H20...N2 | 2.664(6)    | 167.(8)       |
| I-Me:3,5M-BA  | N8-H8...O19  | 2.879(4)    | 161(5)        |
|               | O20-H20...N2 | 2.683(4)    | 174(7)        |
| I-Me:4Cl-BA   | N8-H8...O19  | 2.956(7)    | 169.66(3)     |
|               | O20-H20...N2 | 2.642(6)    | 167.10(4)     |
| I-Et:BA       | N8-H8...O20  | 2.913(4)    | 176.(4)       |
|               | O21-H21...N2 | 2.678(4)    | 174.(5)       |
| Br-Et:BA      | N8-H8...O20  | 2.924(4)    | 177.32(12)    |
|               | O21-H21...N2 | 2.681       | 169.3(13)     |
| I-Pr:BA       | N8-H8...O21  | 2.886(6)    | 173.(7)       |
|               | O22-H22...N2 | 2.715(6)    | 162.(8)       |
| I-Et:4Cl-BA   | N8-H8...O20  | 2.894(10)   | 173.(9)       |
|               | O21-H21...N2 | 2.643(10)   | 166.(13)      |
| H-Et:4Cl-BA   | N7-H7...O19  | 2.8619(3)   | 178(5)        |
|               | O20-H20...N2 | 2.638(7)    | 173(8)        |
| I-Et:3,5M-BA  | N8-H8...O19  | 2.898 (4)   | 161.32(9)     |
|               | O20-H20...N2 | 2.687(4)    | 171.1(7)      |
|               | C4-I7...O21  | 3.324       | 156.51(10)    |
| Br-Et:3,5M-BA | N8-H8...O20  | 2.887(2)    | 163.84(18)    |
|               | O21-H21...N2 | 2.672(4)    | 170.76(2)     |
|               | C4-Br7...O21 | 3.228(2)    | 157.08(11)    |

## 2. Secondary intermolecular interactions in the co-crystals

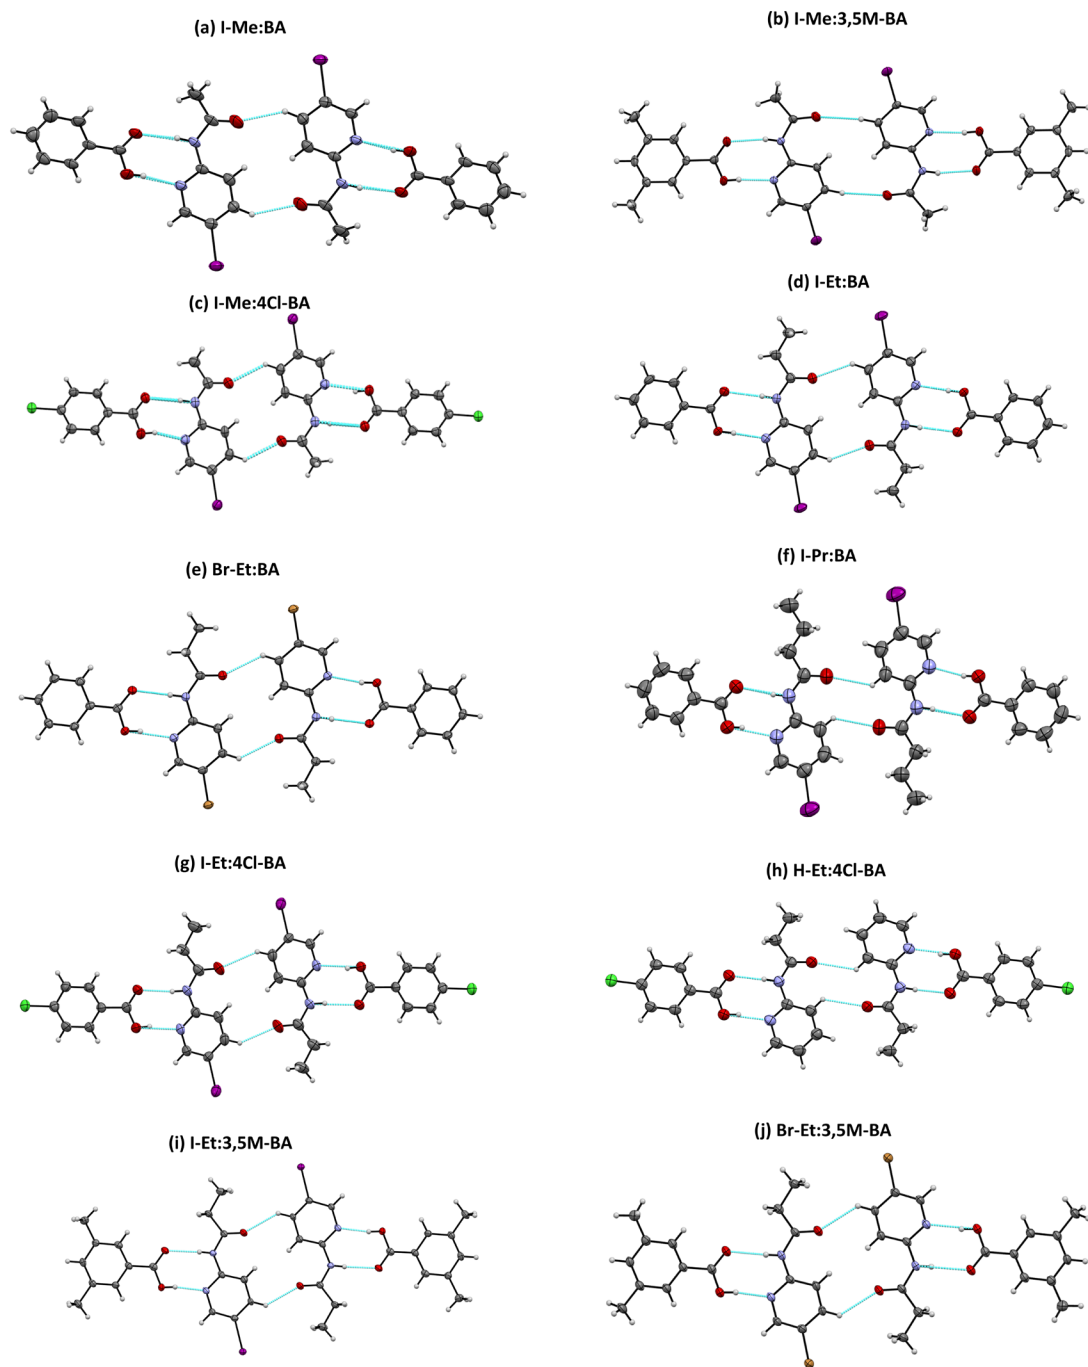

**Figure 3.** Tetramers in the crystal structures of (a) I-Me:BA (b) I-Me:3,5-MBA (c) I-Me:4Cl-BA (d) I-Et:BA (e) Br-Et:BA (f) I-Pr:BA (g) I-Et:4Cl-BA (h) H-Et:4Cl-BA (i) I-Et:3,5-MBA (j) Br-Et:3,5-MBA

### 3. Establishing structure-property correlations using crystal packing features

#### 3.1 Packing features of N-(5-iodopyridin-2-yl)acetamide:3,5-dimethyl benzoic acid (I-Me:3,5M-BA)

(a) Displaced arrangement of tetrameric units

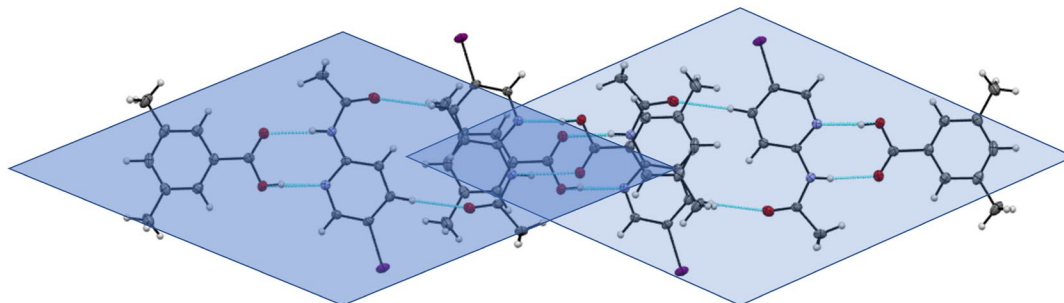

(b) Layered arrangement of molecules

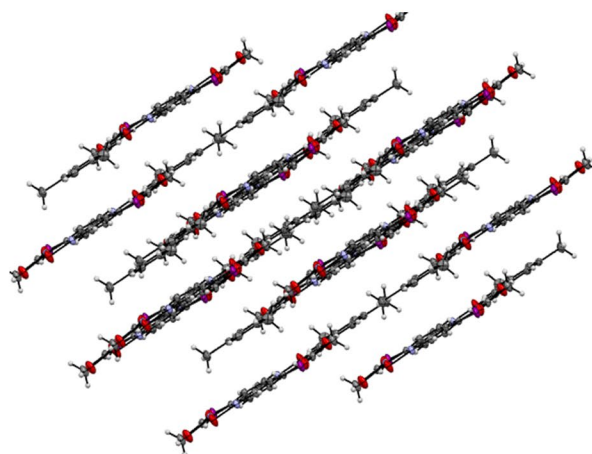

**Figure 4.** Packing features of I-Me:3,5M-BA (a) Displaced arrangement of tetrameric units (b) layered arrangement of molecules.

### 3.2 N-(5-iodopyridin-2-yl)acetamide:4-chloro benzoic acid (I-Me:4Cl-BA)

(a) Stacked columns of tetrameric units

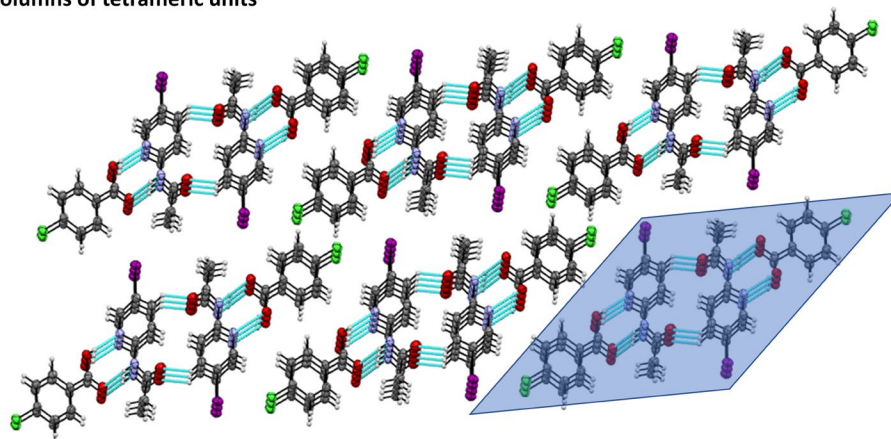

(b) Layered arrangement of molecules

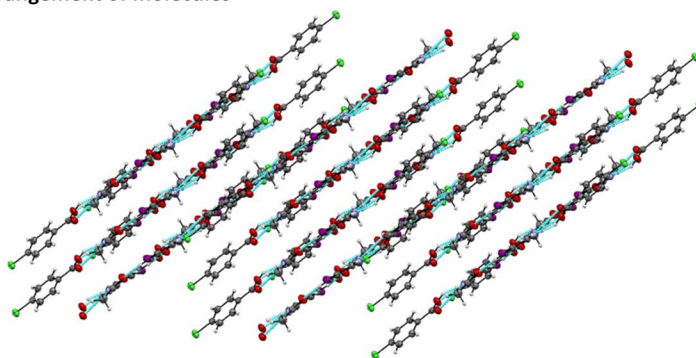

**Figure 5** Packing features of I-Me:4Cl-BA (a) Stacked column of tetrameric units (b) layered arrangement of molecules

### 3.3 N-(5-bromopyridin-2-yl)propionamide:benzoic acid (Br-Et:BA)

(a) Stacked tetrameric units

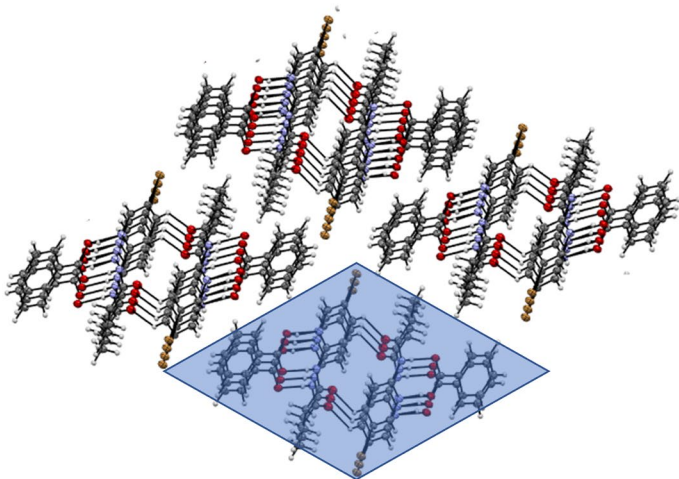

(c) CH $\cdots$  $\pi$  interactions between columns

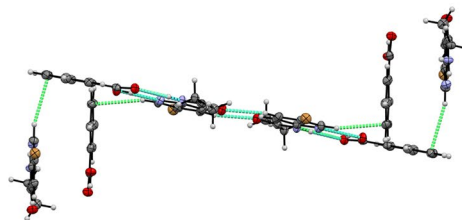

(b) Corrugated arrangement of molecules

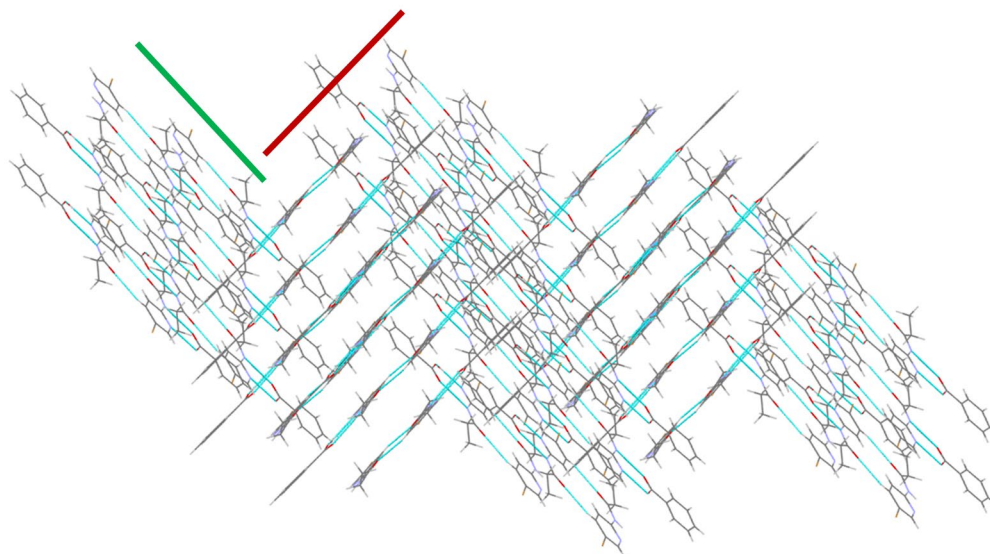

**Figure 6.** Packing features of Br-Et:BA (a) Stacked tetrameric units (b) Corrugated arrangement of molecules (c) CH $\cdots$  $\pi$  interactions between columns



### 3.4 N-(5-iodopyridin-2-yl)butyramide:benzoic acid (I-Pr:BA)

(a) Stacked tetrameric units

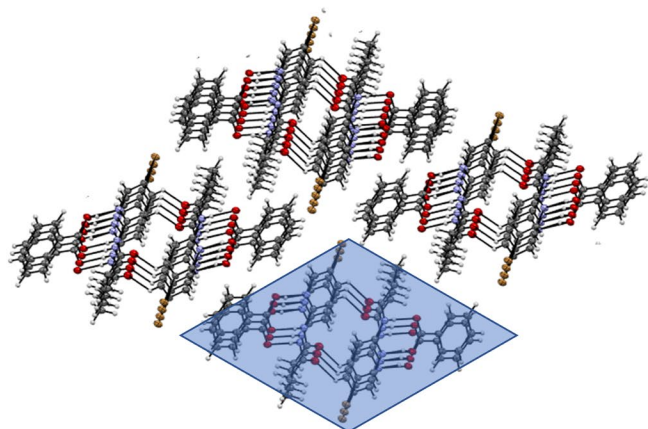

(c) CH $\cdots$  $\pi$  interactions between columns

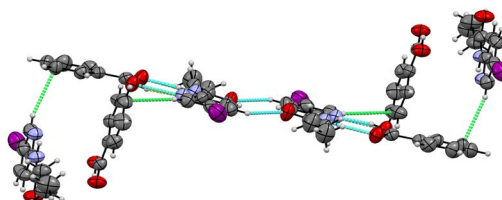

(b) Corrugated arrangement of molecules

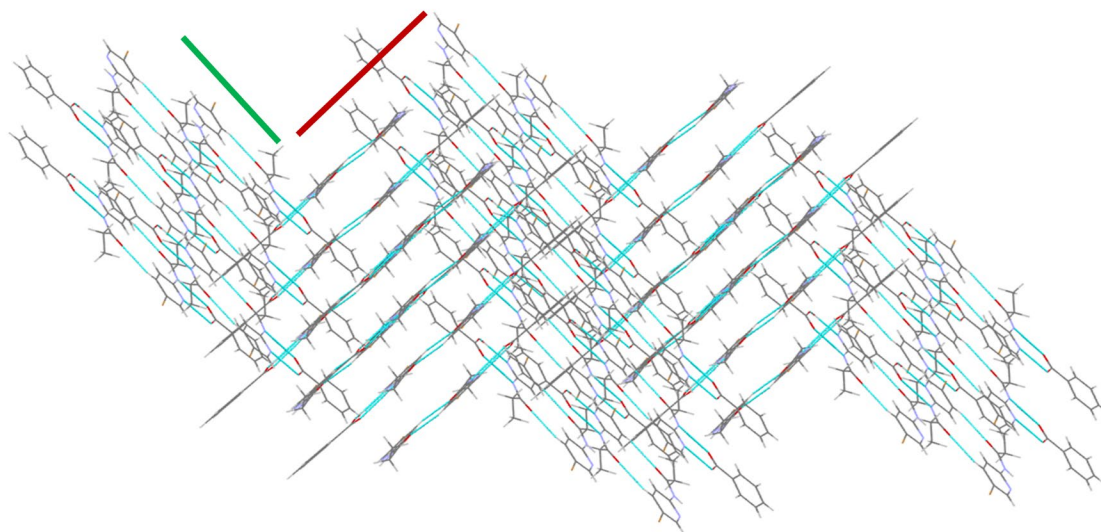

**Figure 7.** Packing features of I-Pr:BA (a) Stacked tetrameric units (b) Corrugated arrangement of molecules (c) CH $\cdots$  $\pi$  interactions between columns



3.5 N-(5-iodopyridin-2-yl)propionamide:4-chloro benzoic acid, I-Et:4Cl-BA

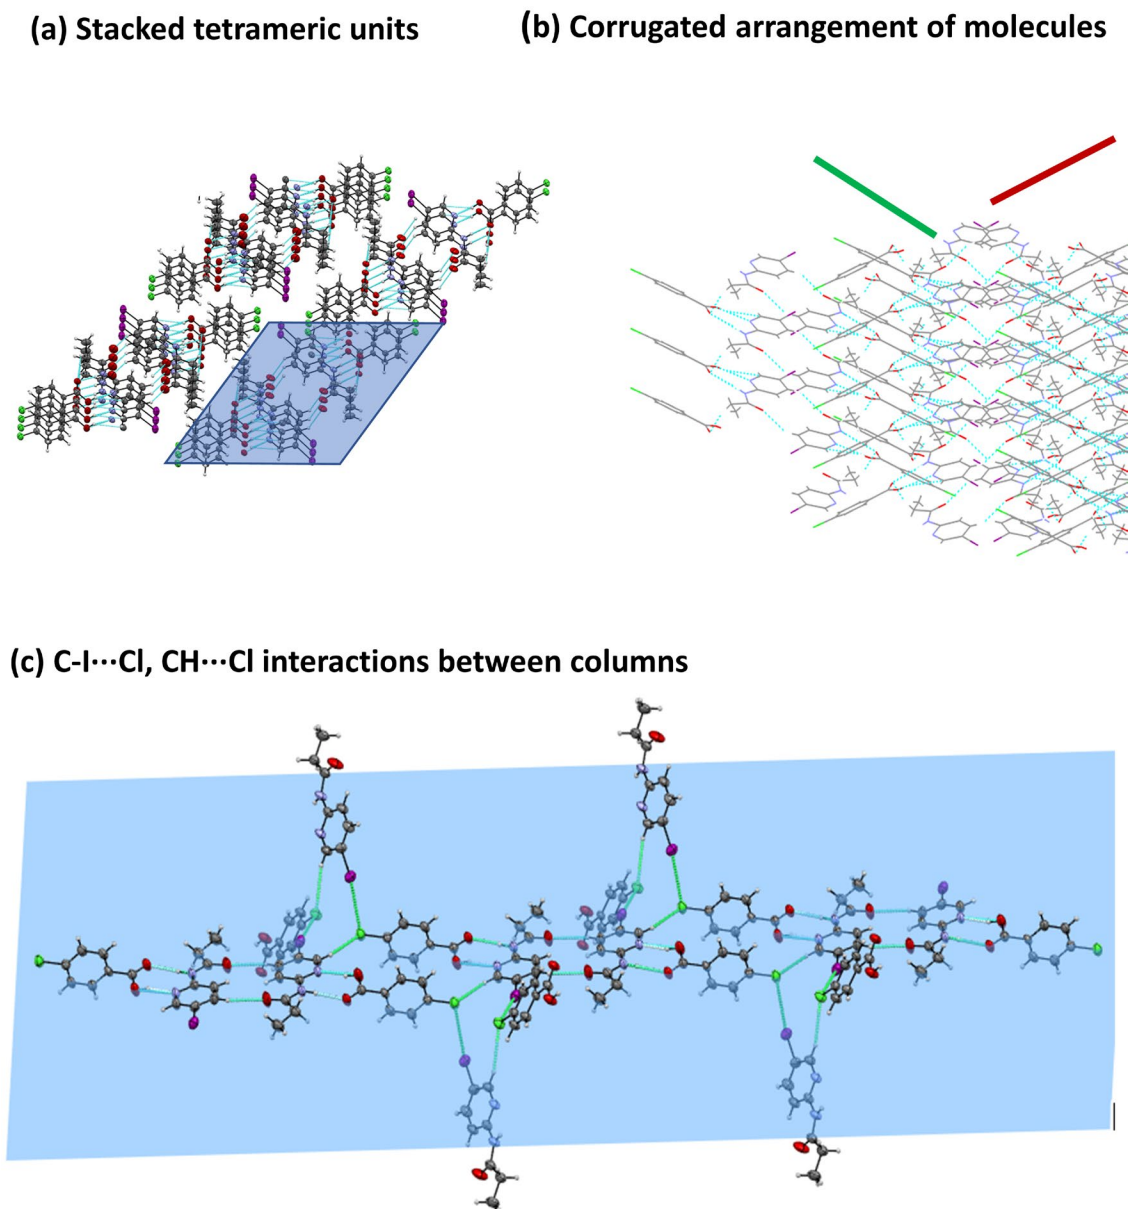

**Figure 8.** Packing features of I-Et:4Cl-BA (a) Stacked tetramers (b) Corrugated arrangement of molecules (c) C-I...Cl, C-H...Cl interactions between columns

3.6 N-(5-pyridin-2-yl)propionamide:4-chloro benzoic acid (H-Et:4Cl-BA)

(a) Stacked tetrameric units

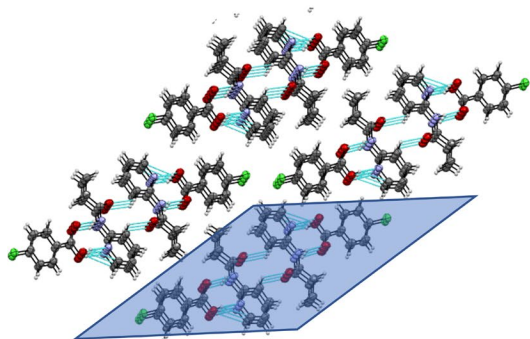

(c) Cl... Cl interactions between columns

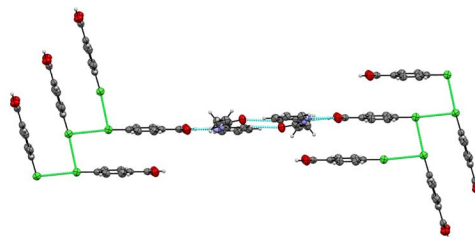

(b) Corrugated arrangement of molecules

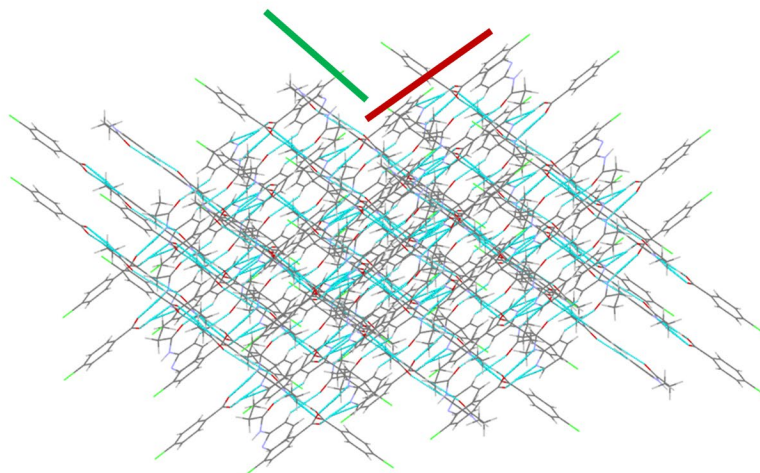

**Figure 9.** Packing features of H-Et:4Cl-BA (a) Stacked tetrameric units (b) Corrugated arrangement of molecules (c) Cl...Cl interactions between columns.

3.7 N-(5-bromopyridin-2-yl)propionamide: 3,5-dimethyl benzoic acid (Br-Et:3,5-MBA)

(a) Stacked tetrameric units

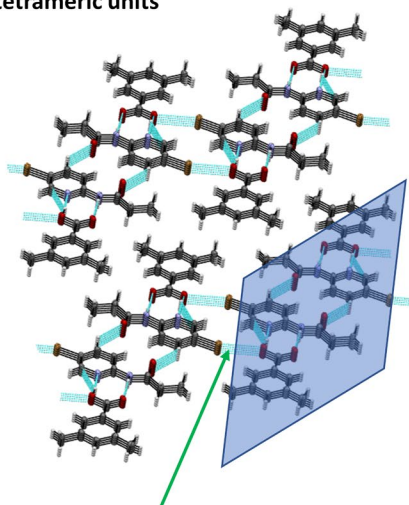

*Intralayer interaction*

(b) Layered arrangement of molecules

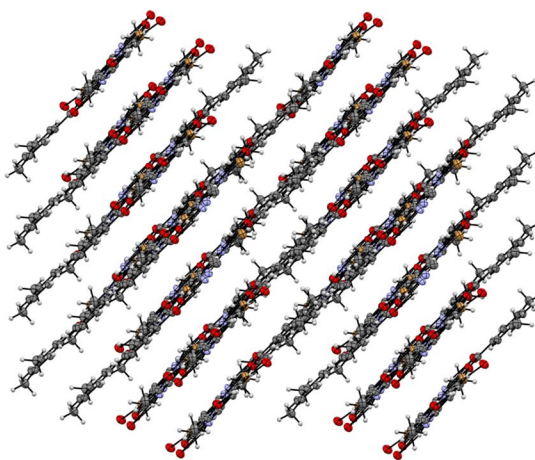

**Figure 10.** Packing features of Br-Et:3,5M-BA (a) Stacked column of tetrameric units interlinked by halogen bonding (b) layered arrangement of molecules

#### 4. X-ray crystallography results

**Table 2.** X-ray crystallography results

| Code                                            | I-Me:BA                                                                                              | I-Me:3,5M-BA                                                                                          | I-Me:4Cl-BA                                                                                            | I-Et:BA                                                                                              | Br-Et:BA                                                                                              |
|-------------------------------------------------|------------------------------------------------------------------------------------------------------|-------------------------------------------------------------------------------------------------------|--------------------------------------------------------------------------------------------------------|------------------------------------------------------------------------------------------------------|-------------------------------------------------------------------------------------------------------|
| CCDC. Deposit no.                               | 2092007                                                                                              | 2092009                                                                                               | 2092010                                                                                                | 2092012                                                                                              | 2103264                                                                                               |
| Formula moiety                                  | (C <sub>7</sub> H <sub>7</sub> IN <sub>2</sub> O)<br>(C <sub>7</sub> H <sub>6</sub> O <sub>2</sub> ) | (C <sub>7</sub> H <sub>7</sub> IN <sub>2</sub> O)<br>(C <sub>9</sub> H <sub>10</sub> O <sub>2</sub> ) | (C <sub>7</sub> H <sub>7</sub> IN <sub>2</sub> O)<br>(C <sub>7</sub> H <sub>5</sub> ClO <sub>2</sub> ) | (C <sub>8</sub> H <sub>9</sub> IN <sub>2</sub> O)<br>(C <sub>7</sub> H <sub>6</sub> O <sub>2</sub> ) | (C <sub>8</sub> H <sub>9</sub> BrN <sub>2</sub> O)<br>(C <sub>7</sub> H <sub>6</sub> O <sub>2</sub> ) |
| Empirical formula                               | C <sub>14</sub> H <sub>13</sub> IN <sub>2</sub> O <sub>3</sub>                                       | C <sub>16</sub> H <sub>17</sub> IN <sub>2</sub> O <sub>3</sub>                                        | C <sub>14</sub> H <sub>12</sub> ClIN <sub>2</sub> O <sub>3</sub>                                       | C <sub>15</sub> H <sub>15</sub> IN <sub>2</sub> O <sub>3</sub>                                       | C <sub>15</sub> H <sub>15</sub> BrN <sub>2</sub> O <sub>3</sub>                                       |
| Molecular weight                                | 384.16                                                                                               | 412.21                                                                                                | 418.61                                                                                                 | 398.19                                                                                               | 351.20                                                                                                |
| Color, Habit                                    | Colorless, Parallelepiped                                                                            | Colorless, Block                                                                                      | Colorless, Needle                                                                                      | Colorless, Rectangular                                                                               | Colorless, Needle                                                                                     |
| Crystal system                                  | Triclinic                                                                                            | Triclinic                                                                                             | Triclinic                                                                                              | Monoclinic                                                                                           | Monoclinic                                                                                            |
| Space group, Z                                  | P -1, 2                                                                                              | P -1, 2                                                                                               | P -1, 2                                                                                                | P 1 21/n 1, 4                                                                                        | P 1 21/n 1, 4                                                                                         |
| <i>a</i> , Å                                    | 4.1768(8)                                                                                            | 7.4358(2)                                                                                             | 4.35000(10)                                                                                            | 14.2075(8)                                                                                           | 14.0457(6)                                                                                            |
| <i>b</i> , Å                                    | 11.513(2)                                                                                            | 10.5039(2)                                                                                            | 11.5717(2)                                                                                             | 4.9292(3)                                                                                            | 4.9964(3)                                                                                             |
| <i>c</i> , Å                                    | 15.476(3)                                                                                            | 11.7955(3)                                                                                            | 15.4381(3)                                                                                             | 22.1266(12)                                                                                          | 21.3687(7)                                                                                            |
| $\alpha$ , °                                    | 78.42(3)                                                                                             | 69.3730(10)                                                                                           | 78.041(2)                                                                                              | 90                                                                                                   | 90                                                                                                    |
| $\beta$ , °                                     | 86.37(3)                                                                                             | 82.684(2)                                                                                             | 88.920(2)                                                                                              | 90.025(2)                                                                                            | 90.928(3)                                                                                             |
| $\gamma$ , °                                    | 86.54(3)                                                                                             | 73.631(2)                                                                                             | 87.755(2)                                                                                              | 90                                                                                                   | 90                                                                                                    |
| Volume, Å <sup>3</sup>                          | 726.7(3)                                                                                             | 826.87(4)                                                                                             | 759.61(3)                                                                                              | 1549.56(15)                                                                                          | 1499.41(12)                                                                                           |
| Density, g/cm <sup>3</sup>                      | 1.756                                                                                                | 1.656                                                                                                 | 1.830                                                                                                  | 1.707                                                                                                | 1.556                                                                                                 |
| <i>T</i> , °K                                   | 200.(2)                                                                                              | 199.99                                                                                                | 200(2)                                                                                                 | 200.(2)                                                                                              | 200.00(10)                                                                                            |
| Crystal size, min x mid x max                   | 0.064 x 0.165 x 0.413                                                                                | 0.065 x 0.08 x 0.11                                                                                   | 0.016 x 0.032 x 0.236                                                                                  | 0.065 x 0.105 x 0.200                                                                                | 0.021 x 0.038 x 0.108                                                                                 |
| X-ray wavelength, Å                             | 1.54178                                                                                              | 1.54178                                                                                               | 1.54184                                                                                                | 1.54178                                                                                              | 1.54184                                                                                               |
| $\mu$ , mm <sup>-1</sup>                        | 17.400                                                                                               | 15.337                                                                                                | 18.289                                                                                                 | 16.344                                                                                               | 3.846                                                                                                 |
| Trans min / max                                 | 0.05 / 0.40                                                                                          | 0.5234 / 0.7533                                                                                       | 0.45933 / 1.00000                                                                                      | 0.14 / 0.42                                                                                          | 0.55829 / 1.00000                                                                                     |
| $\vartheta_{min}$ , °                           | 2.92                                                                                                 | 4.006                                                                                                 | 2.926                                                                                                  | 3.70                                                                                                 | 3.738                                                                                                 |
| $\vartheta_{max}$ , °                           | 70.27                                                                                                | 70.173                                                                                                | 76.860                                                                                                 | 68.40                                                                                                | 77.353                                                                                                |
| Reflections                                     |                                                                                                      |                                                                                                       |                                                                                                        |                                                                                                      |                                                                                                       |
| collected                                       | 11978                                                                                                | 11691                                                                                                 | 15874                                                                                                  | 10580                                                                                                | 12344                                                                                                 |
| independent                                     | 2543                                                                                                 | 2904                                                                                                  | 3214                                                                                                   | 2742                                                                                                 | 3137                                                                                                  |
| observed                                        | 2443                                                                                                 | 2697                                                                                                  | 3028                                                                                                   | 2488                                                                                                 | 2338                                                                                                  |
| <i>R</i> <sub>int</sub>                         | 0.0567                                                                                               | 0.0630                                                                                                | 0.0426                                                                                                 | 0.0488                                                                                               | 0.0524                                                                                                |
| Threshold expression                            | > 2 $\sigma$ ( <i>I</i> )                                                                            | > 2 $\sigma$ ( <i>I</i> )                                                                             | > 2 $\sigma$ ( <i>I</i> )                                                                              | > 2 $\sigma$ ( <i>I</i> )                                                                            | > 2 $\sigma$ ( <i>I</i> )                                                                             |
| No. parameters                                  | 190                                                                                                  | 211                                                                                                   | 192                                                                                                    | 199                                                                                                  | 192                                                                                                   |
| No. restraints                                  | 2                                                                                                    | 2                                                                                                     | 0                                                                                                      | 0                                                                                                    | 0                                                                                                     |
| <i>R</i> <sub>1</sub> (observed)                | 0.0479                                                                                               | 0.0387                                                                                                | 0.0228                                                                                                 | 0.0402                                                                                               | 0.0441                                                                                                |
| <i>wR</i> <sub>2</sub> (all)                    | 0.1257                                                                                               | 0.0911                                                                                                | 0.0615                                                                                                 | 0.1075                                                                                               | 0.1300                                                                                                |
| Goodness of fit (all)                           | 1.059                                                                                                | 1.050                                                                                                 | 1.102                                                                                                  | 1.053                                                                                                | 1.022                                                                                                 |
| $\rho_{max}$ , $\rho_{min}$ , e Å <sup>-3</sup> | 1.616, -1.123                                                                                        | 1.266, -1.016                                                                                         | 0.426, -0.425                                                                                          | 0.796, -1.147                                                                                        | 0.604, -0.535                                                                                         |
| Completeness to 2 $\vartheta$ limit             | 0.924                                                                                                | 0.924                                                                                                 | 0.994                                                                                                  | 0.969                                                                                                | 0.985                                                                                                 |

| Code                                         | I-Pr:BA                                                                                               | I-Et:4Cl-BA                                                                                            | H- Et:4Cl-BA                                                                                           | I- Et:3,5M-BA                                                                                         | Br-Et:3,5M-BA                                                                                          |
|----------------------------------------------|-------------------------------------------------------------------------------------------------------|--------------------------------------------------------------------------------------------------------|--------------------------------------------------------------------------------------------------------|-------------------------------------------------------------------------------------------------------|--------------------------------------------------------------------------------------------------------|
| CCDC. Deposit no.                            | 2092013                                                                                               | 2092014                                                                                                | 2092015                                                                                                | 2092016                                                                                               | 2092017                                                                                                |
| Formula moiety                               | (C <sub>9</sub> H <sub>11</sub> IN <sub>2</sub> O)<br>(C <sub>7</sub> H <sub>6</sub> O <sub>2</sub> ) | (C <sub>8</sub> H <sub>9</sub> IN <sub>2</sub> O)<br>(C <sub>7</sub> H <sub>5</sub> ClO <sub>2</sub> ) | (C <sub>8</sub> H <sub>10</sub> N <sub>2</sub> O)<br>(C <sub>7</sub> H <sub>5</sub> ClO <sub>2</sub> ) | (C <sub>8</sub> H <sub>9</sub> IN <sub>2</sub> O)<br>(C <sub>9</sub> H <sub>10</sub> O <sub>2</sub> ) | (C <sub>8</sub> H <sub>9</sub> BrN <sub>2</sub> O)<br>(C <sub>9</sub> H <sub>10</sub> O <sub>2</sub> ) |
| Empirical formula                            | (C <sub>16</sub> H <sub>17</sub> IN <sub>2</sub> O <sub>3</sub> )                                     | (C <sub>15</sub> H <sub>14</sub> ClIN <sub>2</sub> O <sub>3</sub> )                                    | C <sub>15</sub> H <sub>15</sub> N <sub>2</sub> O <sub>3</sub> Cl                                       | (C <sub>17</sub> H <sub>19</sub> IN <sub>2</sub> O)                                                   | (C <sub>17</sub> H <sub>19</sub> BrN <sub>2</sub> O)                                                   |
| Molecular weight                             | 412.21                                                                                                | 432.63                                                                                                 | 306.74                                                                                                 | 426.24                                                                                                | 379.25                                                                                                 |
| Color, Habit                                 | Colorless,<br>Rectangular                                                                             | Colorless,<br>Rectangular                                                                              | Colorless, Needle                                                                                      | Colorless, Block                                                                                      | Colorless, Needle                                                                                      |
| Crystal system                               | Monoclinic                                                                                            | Monoclinic                                                                                             | Monoclinic                                                                                             | Triclinic                                                                                             | Triclinic                                                                                              |
| Space group, Z                               | P 1 21/n 1, 4                                                                                         | C 1 2/c 1, 8                                                                                           | P 1 21/n 1, 4                                                                                          | P $\bar{1}$ , 2                                                                                       | P $\bar{1}$ , 2                                                                                        |
| a, Å                                         | 15.6069(6)                                                                                            | 34.113(3)                                                                                              | 15.3651(2)                                                                                             | 4.5288(2)                                                                                             | 4.7003(3)                                                                                              |
| b, Å                                         | 4.7766(2)                                                                                             | 4.0412(3)                                                                                              | 4.47304(5)                                                                                             | 12.8682(4)                                                                                            | 12.7927(5)                                                                                             |
| c, Å                                         | 22.7736(8)                                                                                            | 28.573(2)                                                                                              | 21.7942(3)                                                                                             | 15.2840(4)                                                                                            | 14.1635(6)                                                                                             |
| $\alpha$ , °                                 | 90                                                                                                    | 90                                                                                                     | 90                                                                                                     | 97.439(2)                                                                                             | 97.664(3)                                                                                              |
| $\beta$ , °                                  | 92.088(3)                                                                                             | 124.614(3)                                                                                             | 106.2128(14)                                                                                           | 94.401(3)                                                                                             | 93.157(5)                                                                                              |
| $\gamma$ , °                                 | 90                                                                                                    | 90                                                                                                     | 90                                                                                                     | 93.065(3)                                                                                             | 91.561(4)                                                                                              |
| Volume, Å <sup>3</sup>                       | 1696.60(11)                                                                                           | 3241.8(4)                                                                                              | 1438.32(3)                                                                                             | 878.80(5)                                                                                             | 842.24(7)                                                                                              |
| Density, g/cm <sup>3</sup>                   | 1.614                                                                                                 | 1.773                                                                                                  | 1.417                                                                                                  | 1.611                                                                                                 | 1.495                                                                                                  |
| T, °K                                        | 296.(2)                                                                                               | 200.(2)                                                                                                | 200.00(10)                                                                                             | 200.00(10)                                                                                            | 100.01(10)                                                                                             |
| Crystal size, min x mid x max                | 0.040 x 0.065 x 0.110                                                                                 | 0.042 x 0.065 x 0.130                                                                                  | 0.02 x 0.062 x 0.344                                                                                   | 0.059 x 0.089 x 0.155                                                                                 | 0.078 x 0.126 x 0.83                                                                                   |
| X-ray wavelength, Å                          | 1.54178                                                                                               | 1.54178                                                                                                | 1.54178                                                                                                | 1.54184                                                                                               | 1.54184                                                                                                |
| $\mu$ , mm <sup>-1</sup>                     | 14.949                                                                                                | 17.165                                                                                                 | 2.463                                                                                                  | 14.451                                                                                                | 3.467                                                                                                  |
| Trans min / max                              | 0.29/ 0.59                                                                                            | 0.21/0.53                                                                                              | 0.67801/1.00000                                                                                        | 0.66677/ 1.00000                                                                                      | 0.72908/ 1.00000                                                                                       |
| $\vartheta_{min}$ , °                        | 3.49                                                                                                  | 3.15                                                                                                   | 3.146                                                                                                  | 2.926                                                                                                 | 3.154                                                                                                  |
| $\vartheta_{max}$ , °                        | 70.46                                                                                                 | 68.21                                                                                                  | 77.583                                                                                                 | 77.029                                                                                                | 77.194                                                                                                 |
| Reflections                                  |                                                                                                       |                                                                                                        |                                                                                                        |                                                                                                       |                                                                                                        |
| collected                                    | 13110                                                                                                 | 12254                                                                                                  | 13927                                                                                                  | 24138                                                                                                 | 9084                                                                                                   |
| independent                                  | 3111                                                                                                  | 2888                                                                                                   | 3062                                                                                                   | 3664                                                                                                  | 3358                                                                                                   |
| observed                                     | 2171                                                                                                  | 2636                                                                                                   | 2862                                                                                                   | 3224                                                                                                  | 3072                                                                                                   |
| R <sub>int</sub>                             | 0.0525                                                                                                | 0.0500                                                                                                 | 0.0223                                                                                                 | 0.0500                                                                                                | 0.0650                                                                                                 |
| Threshold expression                         | > 2 $\sigma(I)$                                                                                       | > 2 $\sigma(I)$                                                                                        | > 2 $\sigma(I)$                                                                                        | > 2 $\sigma(I)$                                                                                       | > 2 $\sigma(I)$                                                                                        |
| No. parameters                               | 208                                                                                                   | 208                                                                                                    | 192                                                                                                    | 213                                                                                                   | 212                                                                                                    |
| No. restraints                               | 2                                                                                                     | 2                                                                                                      | 0                                                                                                      | 0                                                                                                     | 0                                                                                                      |
| R <sub>1</sub> (observed)                    | 0.0497                                                                                                | 0.0668                                                                                                 | 0.0346                                                                                                 | 0.1082                                                                                                | 0.0560                                                                                                 |
| wR <sub>2</sub> (all)                        | 0.1550                                                                                                | 0.1737                                                                                                 | 0.1024                                                                                                 | 0.1082                                                                                                | 0.1568                                                                                                 |
| Goodness of fit (all)                        | 1.109                                                                                                 | 1.170                                                                                                  | 1.085                                                                                                  | 1.076                                                                                                 | 1.106                                                                                                  |
| $\rho_{max}, \rho_{min}$ , e Å <sup>-3</sup> | 0.730, -0.908                                                                                         | 1.943, -0.876                                                                                          | 0.224, -0.259                                                                                          | 0.954, -1.052                                                                                         | 1.135, -1.134                                                                                          |
| Completeness to 2 $\vartheta$ limit          | 0.961                                                                                                 | 0.976                                                                                                  | 0.996                                                                                                  | 0.982                                                                                                 | 0.945                                                                                                  |

## 5. Synthesis of target molecules.

### ➤ Synthesis of N-(5-iodopyridin-2-yl)acetamide (I-Me)

2-Amino-5-iodopyridine (2.20 g, 10.0 mmol) was dissolved in 50 mL of pyridine and cooled in an ice bath. Acetyl chloride (1.06 mL, 14.8 mmol) was added dropwise maintaining the temperature between 0-5 °C. After the addition was complete the contents were stirred at room temperature until no further starting material (2-amino-5-iodopyridine) was detected by TLC. Upon completion, chilled water (100 mL) was added and stirred for 15 minutes. The reaction contents were extracted with dichloromethane and the organic layer was washed with saturated sodium bicarbonate solution, brine, water and dried with anhydrous magnesium sulfate, filtered, and concentrated *in vacuo* to isolate the pure product. Yield 88 %, m.p 154 – 156°C. <sup>1</sup>H NMR (400 MHz, DMSO-d<sub>6</sub>) δ 10.60 (s, 1H), 8.51 (s, 1H), 8.10 (s, 1H), 7.96 (s, 1H), 2.08 (s, 3H).

### ➤ Synthesis of N-(5-iodopyridin-2-yl)propionamide (I-Et)

2-Amino-5-iodopyridine (2.20 g, 10.0 mmol) was dissolved in 50 mL of pyridine and cooled in an ice bath. Propionyl chloride (1.09 mL, 15.4 mmol) was added dropwise maintaining the temperature between 0-5 °C. After the addition was complete the contents were stirred at room temperature until no further starting material (2-amino-5-iodopyridine) was detected by TLC. Upon completion, chilled water (100 mL) was added and stirred for 15 minutes. The reaction contents were extracted with dichloromethane and the organic layer was washed with saturated sodium bicarbonate solution, brine, water and dried with anhydrous magnesium sulfate, filtered, and concentrated *in vacuo* to isolate the pure product. Yield 90 %, m.p 139 – 141°C. <sup>1</sup>H NMR (400 MHz, DMSO-d<sub>6</sub>) δ 10.53 (s, 1H), 8.50 (s, 1H), 8.09 (s, 1H), 7.98 (s, 1H), 2.37 (s, 2H), 1.05 (s, 3H).

### ➤ Synthesis of N-(5-bromopyridin-2-yl)propionamide (Br-Et)

2-Amino-5-bromopyridine (1.73 g, 10.0 mmol) was dissolved in 50 mL of pyridine and cooled in an ice bath. Propionyl chloride (1.09 mL, 15.4 mmol) was added dropwise maintaining the temperature between 0-5 °C. After the addition was complete the contents were stirred at room temperature until no further starting material (2-amino-5-bromopyridine) was detected by TLC. Upon completion, chilled water (100 mL) was added and stirred for 15 minutes. The reaction contents were extracted with dichloromethane and the organic layer was washed with saturated sodium bicarbonate solution, brine, water and dried with anhydrous magnesium sulfate, filtered, and concentrated *in vacuo* to isolate the pure product. Yield 85 %, m.p 136 – 138 °C. <sup>1</sup>H NMR (400 MHz, DMSO-d<sub>6</sub>) δ 10.58 (s, 1H), 8.40 (s, 1H), 8.08 (s, 1H), 7.97 (s, 1H), 2.37 (s, 2H), 1.07 (s, 3H).

### ➤ Synthesis of N-(5-pyridin-2-yl)propionamide (H-Et)

2-Aminopyridine (0.94 g, 10.0 mmol) was dissolved in 50 mL of pyridine and cooled in an ice bath. Propionyl chloride (1.09 mL, 15.4 mmol) was added dropwise maintaining the temperature between 0-5 °C. After the addition was complete the contents were stirred at room temperature until no further starting material (2-amino-5-pyridine) was detected by TLC. Upon completion, chilled water (100 mL) was

added and stirred for 15 minutes. The reaction contents were extracted with dichloromethane and the organic layer was washed with saturated sodium bicarbonate solution, brine, water and dried with anhydrous magnesium sulfate, filtered, and concentrated *in vacuo* to isolate the pure product. Yield 75%,  $^1\text{H}$  NMR (400 MHz, DMSO- $d_6$ )  $\delta$  10.39 (s, 1H), 8.29 (s, 1H), 8.09 (s, 1H), 7.76 (s, 1H), 7.07 (s, 1H), 2.37 (s, 2H), 1.05 (s, 3H).

➤ Synthesis of N-(5-iodopyridin-2-yl)butyramide (I-Pr)

2-Amino-5-iodopyridine (2.20 g, 10.0 mmol) was dissolved in 50 mL of pyridine and cooled in an ice bath. Butyryl chloride (1.54 mL, 14.8 mmol) was added dropwise maintaining the temperature between 0-5 °C. After the addition was complete the contents were stirred at room temperature until no further starting material (2-amino-5-iodopyridine) was detected by TLC. Upon completion, chilled water (100 mL) was added and stirred for 15 minutes. The reaction contents were extracted with dichloromethane and the organic layer was washed with saturated sodium bicarbonate solution, brine, water and dried with anhydrous magnesium sulfate, filtered, and concentrated *in vacuo* to isolate the pure product. Yield 86%, m.p 136 – 138°C  $^1\text{H}$  NMR (400 MHz, DMSO- $d_6$ )  $\delta$  10.55 (s, 1H), 8.50 (s, 1H), 8.09 (s, 1H), 7.96 (s, 1H), 2.35 (s, 2H), 1.55 (s, 2H), 0.87 (s, 3H).

## 6. Synthesis of co-crystals

All 10 co-crystals were synthesized by slow evaporation of 0.034 mmol the target (I-acetyl/I-propyl/Br-propyl/H-propyl/ I-butyl) and 0.034 mmol of co-former (Benzoic acid, BA/ 4-Chloro benzoic acid, 4Cl-BA/ 3,5-Dimethyl benzoic acid, 3,5-MBA) combined in a 1:1 molar ratio in a solution of Ethyl acetate. The melting points of the co-crystals determined by differential scanning calorimetry (DSC) are given (Table 3)

**Table 3.** Melting points of the co-crystals

| Composition                                                    | Code          | m.p          |
|----------------------------------------------------------------|---------------|--------------|
| N-(5-iodopyridin-2-yl)acetamide:benzoic acid                   | I-Me:BA       | 122 – 124 °C |
| N-(5-iodopyridin-2-yl)acetamide:3,5-dimethyl benzoic acid      | I-Me:3,5M-BA  | 151 – 153 °C |
| N-(5-chloropyridin-2-yl)acetamide: benzoic acid                | I-Me:4Cl-BA   | 145 – 147 °C |
| N-(5-iodopyridin-2-yl)propionamide:benzoic acid                | I-Et:BA       | 123 – 125 °C |
| N-(5-bromopyridin-2-yl)propionamide:benzoic acid               | Br-Et:BA      | 120 – 122 °C |
| N-(5-iodopyridin-2-yl)butyramide:benzoic acid                  | I-Pr:BA       | 99 – 101 °C  |
| N-(5-iodopyridin-2-yl)propionamide:4-chloro benzoic acid       | I-Et:4Cl-BA   | 133 – 135 °C |
| N-(5-pyridin-2-yl)propionamide:4-chloro benzoic acid           | H-Et:4Cl-BA   | 96 – 98 °C   |
| N-(5-iodopyridin-2-yl)propionamide: 3,5-dimethyl benzoic acid  | I-Et:3,5-MBA  | 144 – 146 °C |
| N-(5-bromopyridin-2-yl)propionamide: 3,5-dimethyl benzoic acid | Br-Et:3,5-MBA | 131 – 133 °C |



7. Images of crystals demonstrating flexibility

**(a)I-Et:4Cl-BA**

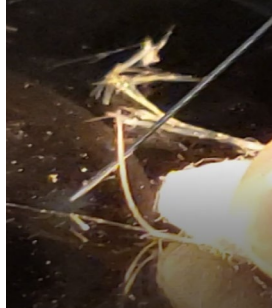

**(b)I-Et:3,5-MBA**

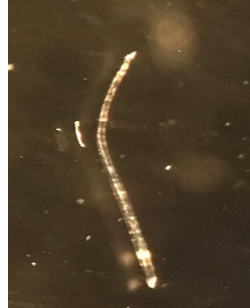

**Figure 11.** Bent co-crystals (a) I-Et:4Cl-BA - elastic and (b) I-Et:3,5-MBA - plastic
